# Supplementary material for: The Western United States MTBS-Interagency database of large wildfires, 1984–2024 (WUMI2024a)
Source: Copernicus journal article supplement (doi:10.5194/essd-2025-366), 2025-07-29
Supplement: Supplementary file 1 [file essd-2025-366-supplement.pdf]

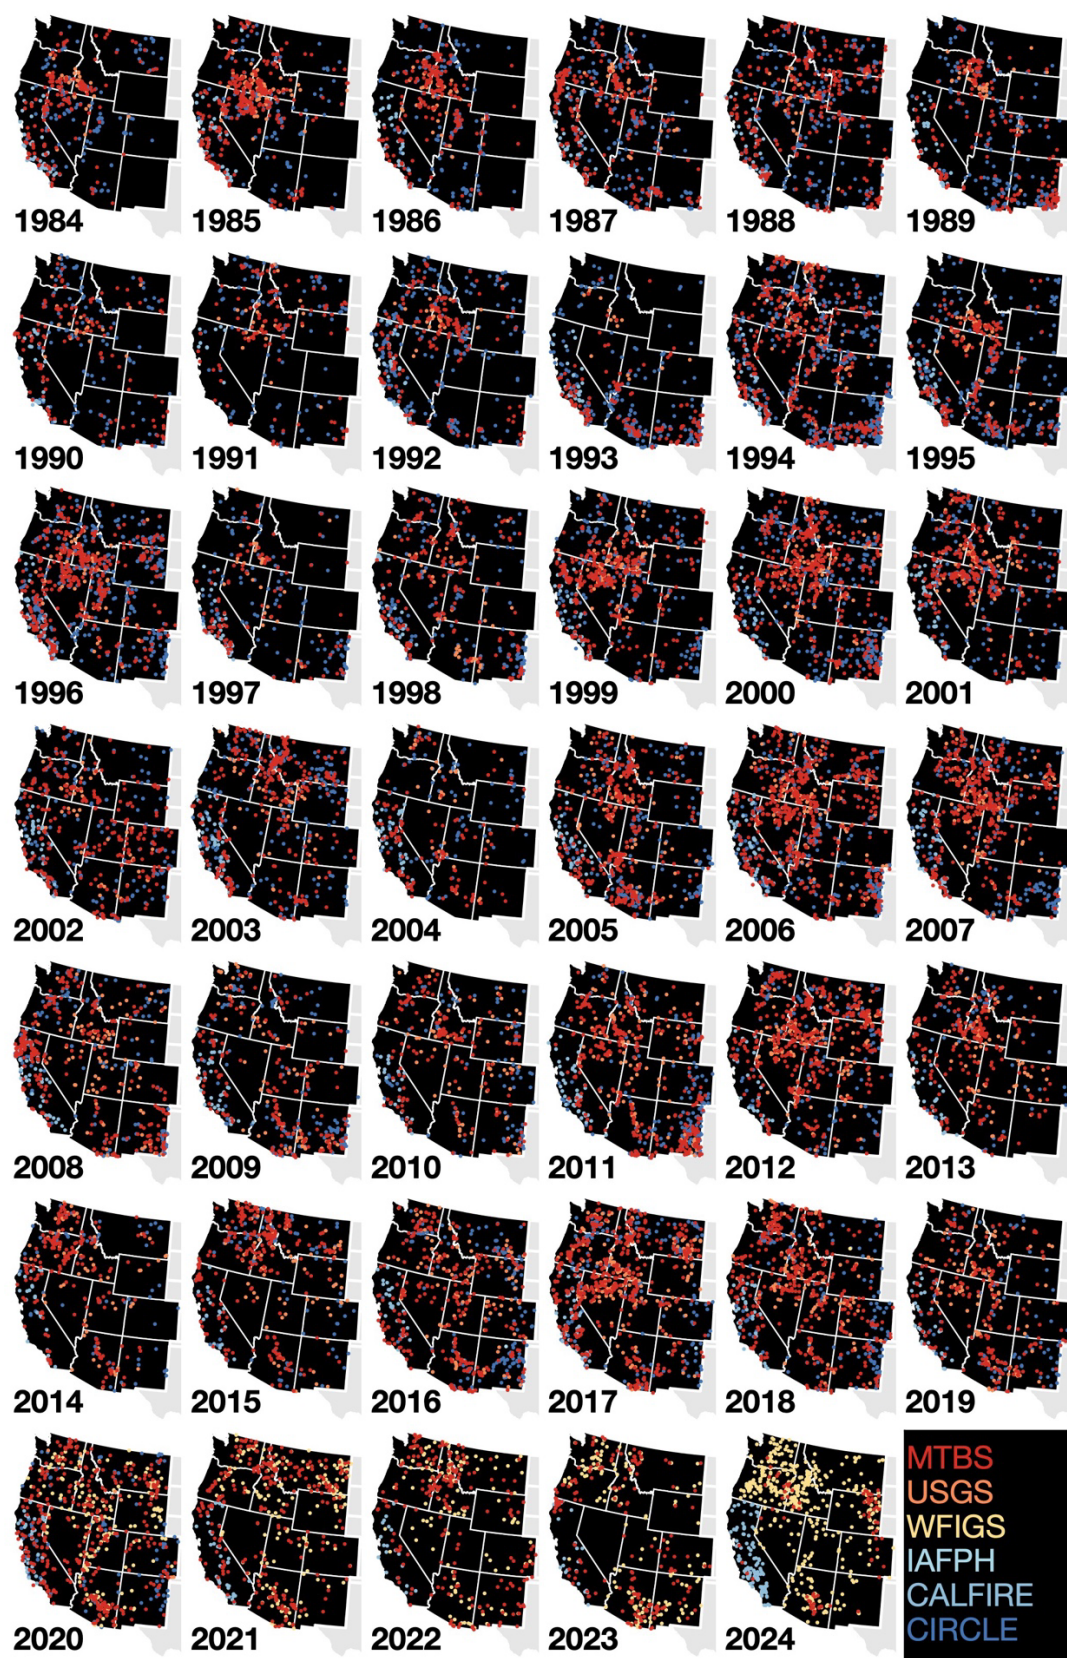

Figure S1. Annual ignition locations of WUMI2024a wildfires with perimeter data from MTBS, WFIGS, CalFire, USGS, or IAFPH, as well as fires lacking perimeter data and assumed circular.
